# Supplementary material for: Predicting breast cancer risk using interacting genetic and demographic factors and machine learning
Source: PubMed Central journal article supplement (PMC7338351; doi:10.1038/s41598-020-66907-9), 2020-07-06
Supplement: 41598_2020_66907_MOESM1_ESM.pdf [file 41598_2020_66907_MOESM1_ESM.pdf]

# **Predicting breast cancer risk using interacting genetic and demographic factors and machine learning**

Hamid Behravan<sup>\*1</sup>, Jaana M. Hartikainen<sup>1</sup>, Maria Tengström<sup>3,4</sup>, Veli-Matti Kosma<sup>1,2,†</sup> & Arto Mannermaa<sup>1,2,†</sup>

<sup>1</sup> Institute of Clinical Medicine, Pathology and Forensic Medicine, and Translational Cancer Research Area, University of Eastern Finland, P.O. Box 1627, FI-70211, Kuopio, Finland.

<sup>2</sup> Biobank of Eastern Finland, Kuopio University Hospital, Kuopio, Finland.

<sup>3</sup> Institute of Clinical Medicine, Oncology, University of Eastern Finland, P.O. Box 1627, FI-70211, Kuopio, Finland.

<sup>4</sup> Cancer Center, Kuopio University Hospital, Kuopio, P.O. Box 100, FI-70029, Kuopio, Finland

† These authors contributed equally.

\* Corresponding author: hamid.behravan@uef.fi

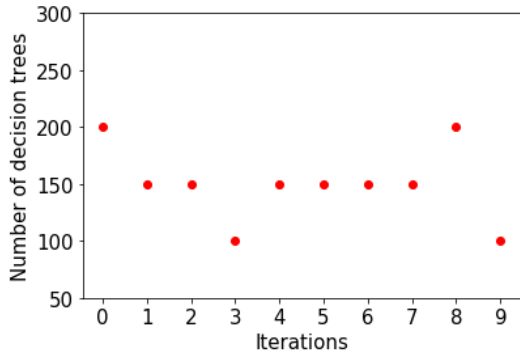

a) Number of decision trees

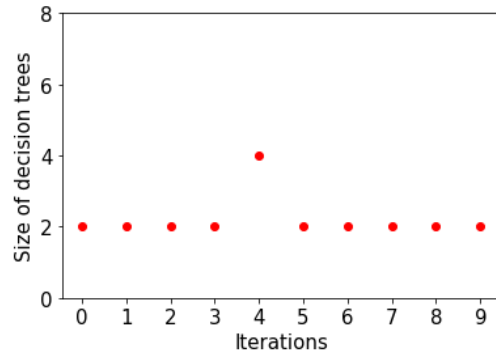

b) Size of decision trees

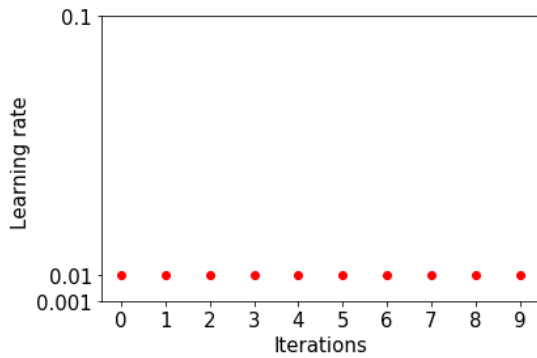

c) learning rate

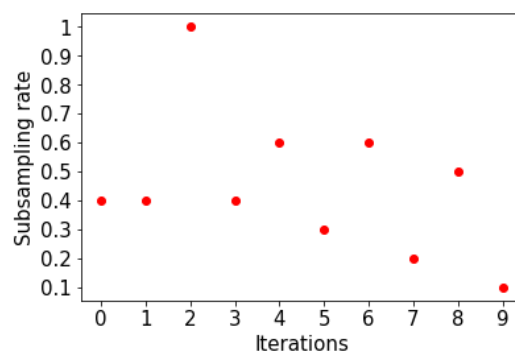

d) subsampling rate

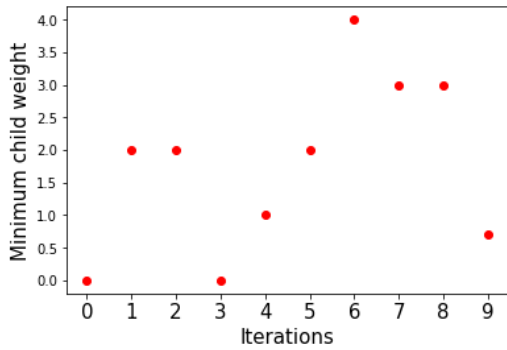

e) Minimum child weight

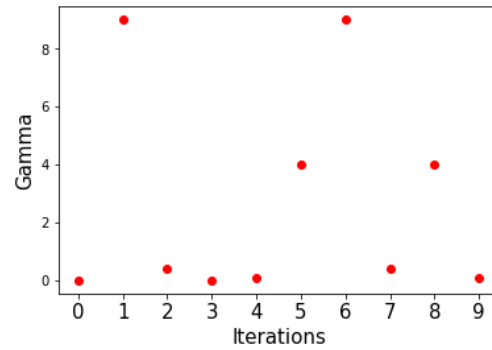

f) Gamma

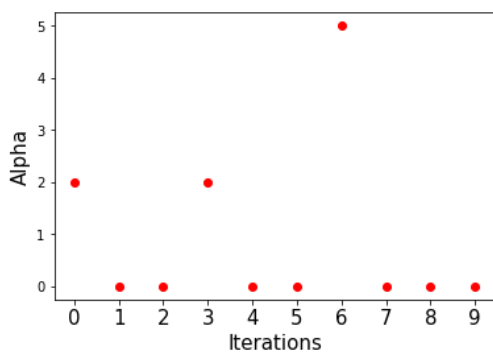

g) Alpha

**Figure S1:** The optimal values of the XGBoost hyperparameters obtained at each iteration.

**Table S1:** List of 82 published BC-associated SNPs and their corresponding odd ratio (OR) value from <sup>9,37,38</sup>.

\*OR value and effect allele were obtained from GWAS Central (<http://www.gwascentral.org/>).

| <b>SNP name</b> | <b>Odd ratio</b> | <b>Effect allele</b> |            |      |   |
|-----------------|------------------|----------------------|------------|------|---|
| rs616488*       | 1.1              | A                    | rs11075995 | 1.04 | A |
| rs4245739       | 1.03             | C                    | rs13329835 | 1.08 | G |
| rs12710696      | 1.04             | A                    | rs6504950* | 1.06 | G |
| rs4849887*      | 1.1              | G                    | rs527616*  | 1.05 | G |
| rs1550623*      | 1.06             | A                    | rs1436904* | 1.04 | A |
| rs6762644       | 1.07             | G                    | rs2363956  | 1.03 | A |
| rs1053338       | 1.08             | G                    | rs4808801* | 1.08 | A |
| rs7726159       | 1.04             | A                    | rs2823093* | 1.09 | G |
| rs2736108       | 1.07             | G                    | rs132390   | 1.14 | G |
| rs889312        | 1.12             | C                    | rs6001930  | 1.12 | G |
| rs10472076      | 1.05             | G                    | rs637868   | 1.04 | G |
| rs1353747*      | 1.09             | A                    | rs17426269 | 1.05 | G |
| rs1432679       | 1.07             | G                    | rs16886165 | 1.23 | C |
| rs11242675*     | 1.06             | A                    | rs11949391 | 0.9  | G |
| rs17529111      | 1.06             | G                    | rs10022462 | 1.04 | G |
| rs12662670      | 1.17             | C                    | rs17156577 | 1.05 | G |
| rs2046210       | 1.08             | A                    | rs17350191 | 1.07 | G |
| rs9693444       | 1.07             | A                    | rs2380205  | 1.06 | G |
| rs11780156      | 1.07             | A                    | rs3757322  | 1.08 | C |
| rs1011970       | 1.06             | A                    | rs2747652  | 1.06 | G |
| rs10759243      | 1.05             | A                    | rs10816625 | 1.11 | G |
| rs865686*       | 1.12             | A                    | rs13294895 | 1.06 | G |
| rs7072776       | 1.07             | A                    | rs4577244  | 1.08 | G |
| rs11814448      | 1.27             | C                    | rs7297051  | 1.05 | G |
| rs704010        | 1.08             | A                    | rs6562760  | 1.05 | G |
| rs7904519       | 1.05             | G                    | rs1219648  | 1.22 | G |
| rs11199914*     | 1.05             | G                    | rs2981575  | 1.28 | G |
| rs2981579       | 1.27             | A                    | rs2981582  | 1.18 | G |
| rs3817198       | 1.07             | G                    | rs2420946  | 1.19 | G |
| rs554219        | 1.26             | G                    | rs1641535  | 1.17 | G |
| rs11820646*     | 1.05             | G                    | rs231775   | 1.04 | G |
| rs12422552      | 1.04             | C                    | rs4919682  | 1.04 | G |
| rs10771399*     | 1.16             | A                    | rs1695     | 1.16 | G |
| rs17356907*     | 1.1              | A                    | rs1800067  | 1.08 | G |
| rs1292011*      | 1.09             | A                    | rs1056836  | 1.08 | G |
| rs11571833      | 1.27             | T                    | rs4986938  | 0.94 | G |
| rs2588809       | 1.08             | A                    | rs1801516  | 1.18 | G |
| rs999737*       | 1.09             | G                    | rs1801270  | 2.08 | C |
| rs941764        | 1.07             | G                    | rs2287499  | 1.08 | G |
| rs3803662       | 1.24             | A                    | rs570613   | 1    | G |
| rs17817449*     | 1.09             | A                    | rs1801320  | 1.04 | G |

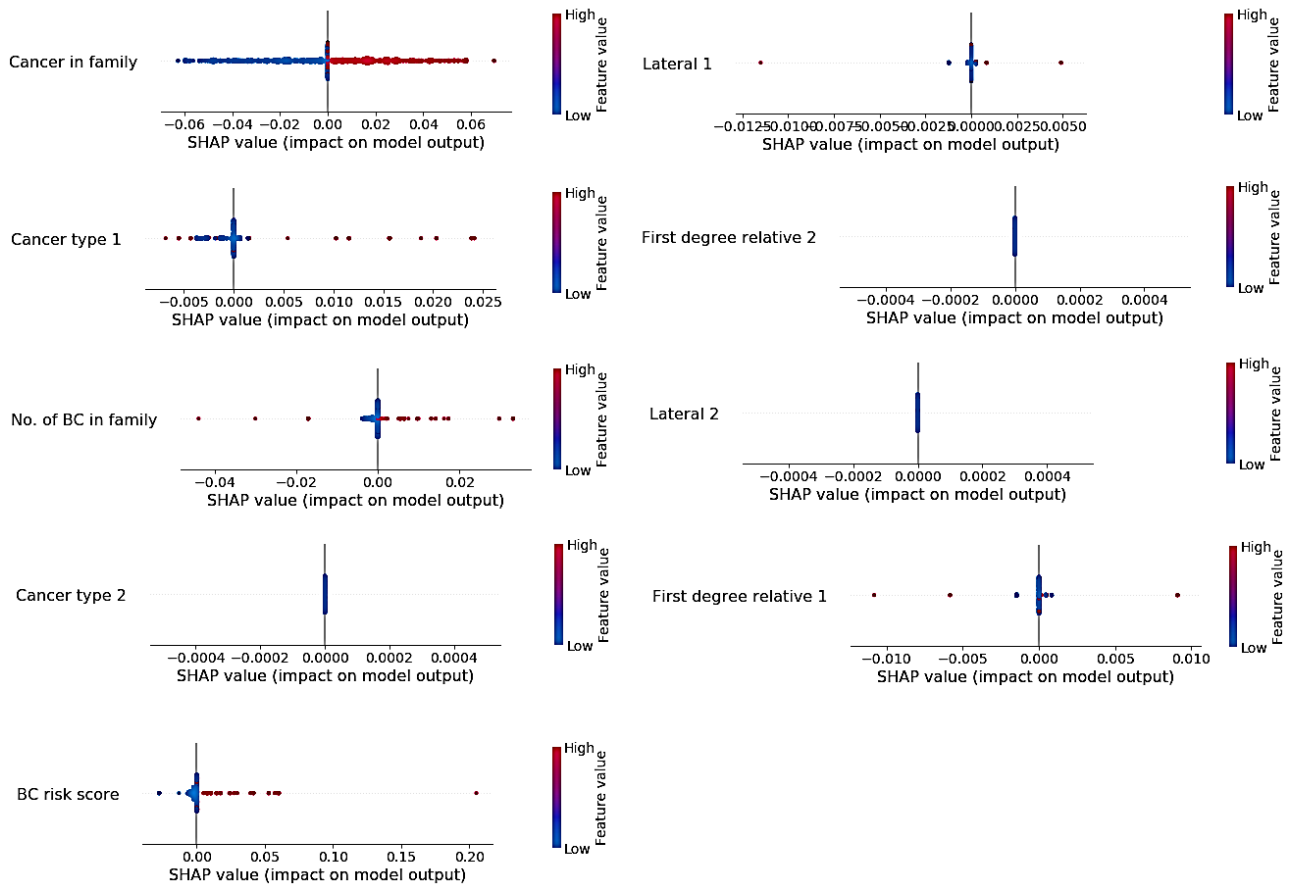

**Figure S2:** Full feature's value contribution analysis of the Group 1 features using SHAP value <sup>44</sup>.

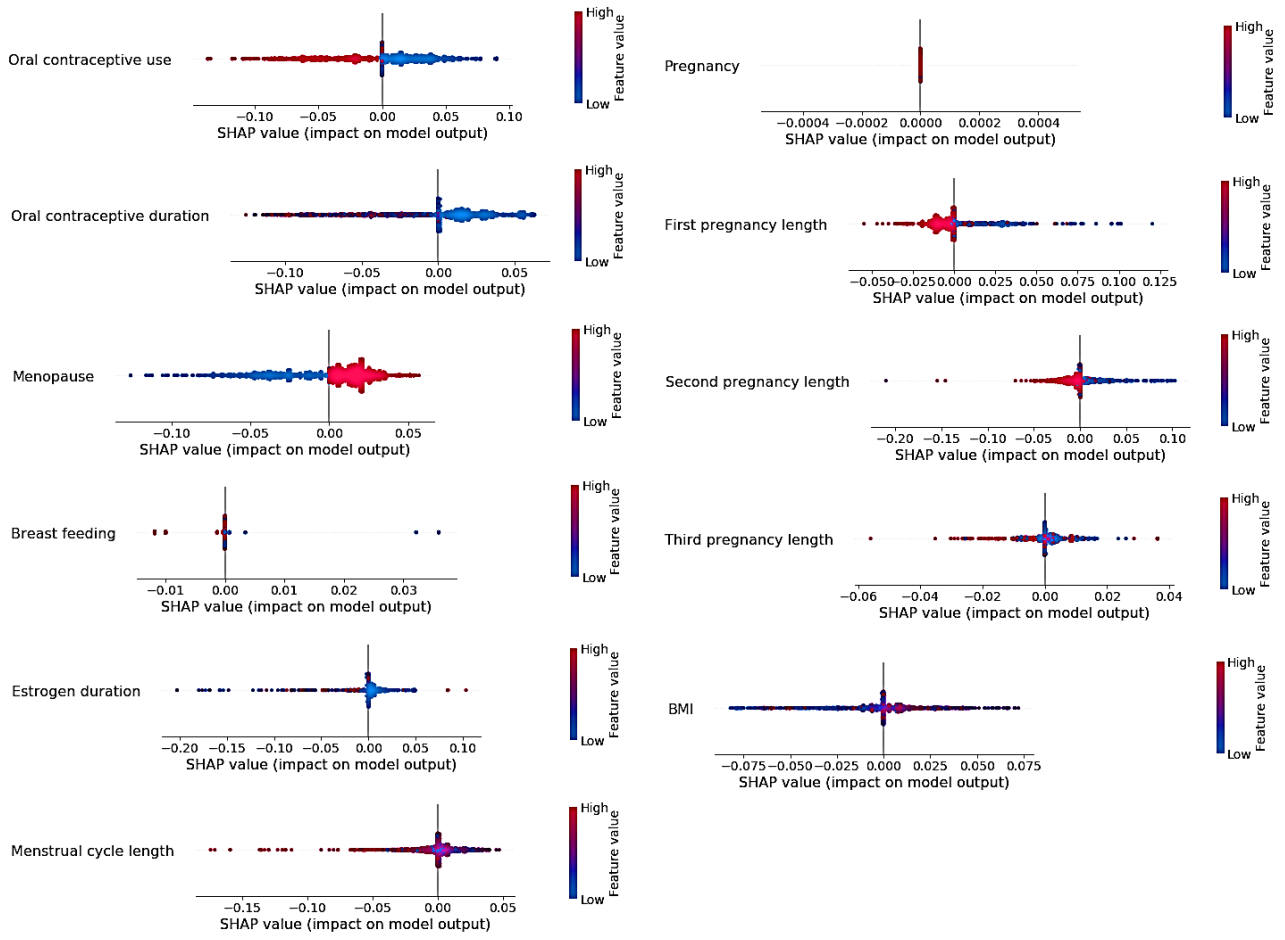

**Figure S3:** Full feature's value contribution analysis of the Group 2 features using SHAP value.

**Table S2:** SNPs found interacting with the Group 1 features in the BC risk prediction task and their associated genes.

| <b>Variant</b> | <b>Chromosome</b> | <b>Position start (bp)</b> | <b>Associated gene name</b> |
|----------------|-------------------|----------------------------|-----------------------------|
| rs2043885      | 2                 | 124098762                  | CNTNAP5                     |
| rs1466379      | 18                | 31476502                   | DSG3                        |
| rs12764105     | 10                | 54718524                   | PCDH15                      |
| rs899968       | 18                | 63155031                   | BCL2                        |
| rs7129973      | 11                | 89182402                   | TYR                         |
| rs1328710      | 6                 | 71892861                   | RIMS1                       |
| rs2275060      | 10                | 70530022                   | PALD1                       |
| rs4937216      | 11                | 126898194                  | KIRREL3                     |
| rs2955005      | 8                 | 81706019                   | ZFAND1                      |
| rs13439971     | 9                 | 94151482                   | AL158152.2                  |
| rs12660679     | 6                 | 21540396                   | AL512380.2                  |
| rs4841553      | 8                 | 11549306                   | BLK                         |
| rs5934247      | X                 | 6929871                    | PUDP                        |
| rs9642393      | 7                 | 55177954                   | EGFR                        |
| rs6985267      | 8                 | 10423308                   | MSRA                        |
| rs2405942      | X                 | 9846095                    | SHROOM2                     |
| rs2592551      | 2                 | 85553008                   | GGCX                        |
| rs17169573     | 7                 | 16668403                   | BZW2                        |
| rs9947504      | 18                | 63920849                   | SERPINB10                   |
| rs17408227     | 5                 | 31459636                   | DROSHA                      |
| rs3772073      | 2                 | 160284359                  | RBMS1                       |
| rs543152       | 18                | 68290555                   | AC005909.2                  |
| rs2570501      | 2                 | 103895768                  | LINC01965                   |
| rs4276227      | 3                 | 32289194                   | CMTM8                       |
| rs635817       | 1                 | 229815275                  | LINC01682                   |
| rs13099184     | 3                 | 142455574                  | ATR                         |
| rs769149       | 11                | 35510904                   | PAMR1                       |
| rs679958       | 13                | 110226660                  | COL4A1                      |

|            |    |           |            |
|------------|----|-----------|------------|
| rs10451920 | 3  | 167320151 | ZBBX       |
| rs1539214  | 14 | 47021176  | MDGA2      |
| rs9309559  | 2  | 26918647  | DPYSL5     |
| rs2140336  | 4  | 8423104   | ACOX3      |
| rs2296622  | 1  | 91696021  | TGFBR3     |
| rs7524066  | 1  | 91719257  | TGFBR3     |
| rs12022777 | 1  | 190664850 | LINC01720  |
| rs309058   | 1  | 98936668  | PLPPR5     |
| rs10746488 | 1  | 9362248   | SPSB1      |
| rs1255135  | 10 | 128319373 | AL390763.1 |
| rs11051493 | 12 | 31628444  | AC068774.1 |
| rs12441317 | 15 | 98131599  | AC022523.3 |
| rs17544073 | 7  | 47411974  | TNS3       |
| rs524554   | 3  | 140470306 | CLSTN2     |
| rs10898957 | 11 | 74114458  | C2CD3      |
| rs130191   | 22 | 48722786  | TAFA5      |
| rs198197   | 16 | 24117066  | PRKCB      |
| rs267720   | 1  | 30024395  | LINC01648  |
| rs11761294 | 7  | 91513085  | AC079760.1 |
| rs7279730  | 21 | 16589224  | MIR99AHG   |
| rs11751325 | 6  | 24522566  | ALDH5A1    |
| rs2034732  | 2  | 3834471   | DCDC2C     |
| rs9455309  | 6  | 71057928  | AL096709.1 |
| rs990672   | 2  | 229091602 | PID1       |
| rs11761294 | 7  | 91513085  | AC079760.2 |
| rs12619842 | 2  | 164088534 | AC016766.1 |
| rs1999652  | 6  | 6574151   | LY86-AS1   |
| rs685098   | 17 | 38912682  | LASP1      |
| rs12224675 | 11 | 11985530  | DKK3       |
| rs6765155  | 3  | 14687590  | C3orf20    |

|            |                |           |            |
|------------|----------------|-----------|------------|
| rs1468052  | 6              | 133688556 | TARID      |
| rs5972046  | X              | 36401749  | AL606516.1 |
| rs28923193 | 17             | 12093379  | MAP2K4     |
| rs4960658  | 7              | 154983713 | PAXIP1     |
| rs12441317 | 15             | 98131599  | AC022523.1 |
| rs420709   | 7              | 102062241 | CUX1       |
| rs7432941  | 3              | 70213926  | MDFIC2     |
| rs1343921  | 4              | 89026311  | FAM13A     |
| rs1046654  | 11             | 94498681  | ANKRD49    |
| rs970169   | 16             | 58859685  | AC106793.1 |
| rs4897633  | 8              | 134213081 | AC105180.2 |
| rs970169   | 16             | 58859685  | AC092378.1 |
| rs12445232 | 16             | 65101212  | CDH11      |
| rs6985267  | CHR_HG76_PATCH | 9528469   | MSRA       |
| rs7432941  | 3              | 70213926  | SAMMSON    |
| rs4235253  | 4              | 8044136   | ABLIM2     |
| rs7104359  | 11             | 103826689 | AP002989.1 |
| rs6497755  | 16             | 24775874  | TNRC6A     |
| rs4841553  | CHR_HG76_PATCH | 8403522   | AC270286.1 |
| rs11079651 | 17             | 66350051  | PRKCA      |
| rs4897633  | 8              | 134213081 | AC105180.1 |
| rs12959390 | 18             | 25147011  | ZNF521     |
| rs9931092  | 16             | 83113320  | CDH13      |
| rs1533763  | 11             | 76189483  | WNT11      |
| rs9921664  | 16             | 79015383  | WWOX       |
| rs4627704  | 3              | 73822774  | LINC02005  |
| rs1390203  | 12             | 71199261  | TSPAN8     |
| rs11211262 | 1              | 46255483  | RAD54L     |



**Table S3:** SNPs found interacting with the Group 2 features in the BC risk prediction task and their associated genes.

| <b>Variant</b> | <b>Chromosome</b>    | <b>Position start (bp)</b> | <b>Associated gene name</b> |
|----------------|----------------------|----------------------------|-----------------------------|
| rs3743083      | 15                   | 78281277                   | AC090607.4                  |
| rs3743083      | 15                   | 78281277                   | WDR61                       |
| rs3743083      | 15                   | 78281277                   | DNAJA4                      |
| rs10811186     | 9                    | 19440125                   | ACER2                       |
| rs9548070      | 13                   | 37841860                   | TRPC4                       |
| rs4689278      | 4                    | 5689175                    | EVC2                        |
| rs1078080      | 10                   | 116064228                  | GFRA1                       |
| rs2955005      | 8                    | 81706019                   | ZFAND1                      |
| rs1146261      | 20                   | 36858756                   | SOGA1                       |
| rs1096752      | 5                    | 77253733                   | AC022414.1                  |
| rs3772073      | 2                    | 160284359                  | RBMS1                       |
| rs1096752      | 5                    | 77253733                   | PDE8B                       |
| rs1328710      | 6                    | 71892861                   | RIMS1                       |
| rs3731714      | 2                    | 201196097                  | CASP10                      |
| rs10811657     | 9                    | 22127642                   | CDKN2B-AS1                  |
| rs2592551      | 2                    | 85553008                   | GGCX                        |
| rs11985853     | 8                    | 127619279                  | AC104370.1                  |
| rs13052371     | 21                   | 32106374                   | LINC00159                   |
| rs140519       | 22                   | 50549633                   | KLHDC7B                     |
| rs6138482      | 20                   | 25078806                   | VSX1                        |
| rs2515767      | 12                   | 11825015                   | ETV6                        |
| rs12448631     | 16                   | 25948481                   | AC093516.1                  |
| rs2272300      | 12                   | 53193684                   | ZNF740                      |
| rs2272300      | 12                   | 53193684                   | ITGB7                       |
| rs12441317     | 15                   | 98131599                   | AC022523.3                  |
| rs10746488     | 1                    | 9362248                    | SPSB1                       |
| rs198197       | 16                   | 24117066                   | PRKCB                       |
| rs635817       | 1                    | 229815275                  | LINC01682                   |
| rs9455309      | 6                    | 71057928                   | AL096709.1                  |
| rs1999652      | 6                    | 6574151                    | LY86-AS1                    |
| rs13099184     | 3                    | 142455574                  | ATR                         |
| rs2923731      | 15                   | 85048516                   | PDE8A                       |
| rs2034732      | 2                    | 3834471                    | DCDC2C                      |
| rs3027001      | 1                    | 159199673                  | CADM3-AS1                   |
| rs2954669      | 8                    | 144809348                  | ZNF517                      |
| rs2188278      | 7                    | 106375865                  | AC004917.1                  |
| rs10898957     | 11                   | 74114458                   | C2CD3                       |
| rs1371736      | 7                    | 9149856                    | AC004852.2                  |
| rs1468052      | 6                    | 133688556                  | TARID                       |
| rs11051493     | 12                   | 31628444                   | AC068774.1                  |
| rs573123       | 6                    | 149312973                  | TAB2                        |
| rs1327786      | 9                    | 109784497                  | PALM2-AKAP2                 |
| rs3828191      | 2                    | 164493392                  | GRB14                       |
| rs1041992      | 19                   | 41625899                   | CEACAM4                     |
| rs1041992      | CHR_HSCHR19_3_CTG3_1 | 41634241                   | CEACAM4                     |

|            |    |           |            |
|------------|----|-----------|------------|
| rs309058   | 1  | 98936668  | PLPPR5     |
| rs12441317 | 15 | 98131599  | AC022523.1 |
| rs12448631 | 16 | 25948481  | HS3ST4     |
| rs11751325 | 6  | 24522566  | ALDH5A1    |
| rs4960658  | 7  | 154983713 | PAXIP1     |
| rs7614     | 18 | 54154874  | MBD2       |
| rs10899600 | 11 | 79166383  | TENM4      |
| rs3027001  | 1  | 159199673 | CADM3      |
| rs13191563 | 6  | 69003165  | ADGRB3     |
| rs4682664  | 3  | 134201065 | RYK        |
| rs2709437  | 2  | 5983360   | SILC1      |
| rs11594610 | 10 | 113153224 | TCF7L2     |
| rs16831558 | 1  | 44036491  | AL139220.2 |
| rs11757540 | 6  | 151826072 | ESR1       |
| rs827423   | 6  | 151835062 | ESR1       |
| rs11794667 | 9  | 16342067  | C9orf92    |
| rs1533763  | 11 | 76189483  | WNT11      |
| rs6757785  | 2  | 172431436 | ITGA6      |
| rs4627704  | 3  | 73822774  | LINC02005  |
| rs1343921  | 4  | 89026311  | FAM13A     |
| rs10513808 | 3  | 186938656 | ST6GAL1    |
| rs3828057  | 1  | 151807701 | RORC       |
| rs10847255 | 12 | 127011943 | LINC02405  |
| rs10495062 | 1  | 217631613 | SPATA17    |
| rs6531084  | 2  | 16378317  | AC010880.1 |
| rs1007938  | 12 | 26649616  | ITPR2      |
| rs10163440 | 16 | 77660400  | AC092724.1 |
| rs11211262 | 1  | 46255483  | RAD54L     |
| rs2569475  | 19 | 51062718  | KLK13      |
| rs4897633  | 8  | 134213081 | AC105180.2 |
| rs10503929 | 8  | 32756465  | NRG1       |
| rs10878264 | 12 | 65365742  | MSRB3      |
| rs12599670 | 16 | 83937504  | MLYCD      |
| rs1649200  | 10 | 121484216 | FGFR2      |
| rs12599670 | 16 | 83937504  | OSGIN1     |
| rs1046654  | 11 | 94498681  | ANKRD49    |
| rs34729252 | 6  | 139361625 | AL592429.2 |
| rs12380828 | 9  | 82744914  | AL162726.3 |
| rs1075010  | 12 | 13765407  | GRIN2B     |
| rs4897633  | 8  | 134213081 | AC105180.1 |
| rs12988180 | 2  | 200857433 | CLK1       |
| rs10847255 | 12 | 127011943 | LINC02405  |
| rs954811   | 16 | 78907874  | WWOX       |
| rs7104359  | 11 | 103826689 | AP002989.1 |
| rs313403   | 11 | 103321803 | DYNC2H1    |
